# Supplementary material
Source: HighWire-hosted journal article supplement (https://erj.ersjournals.com/content/60/3/2101585)
Supplement: inline-supplementary-material-1 [file inline-supplementary-material-1.pdf]

**Table 6: GRADE table: Can airway obstruction measured by spirometry (FEV<sub>1</sub>/FVC ratio) help diagnose asthma in adults with episodic/chronic suggestive symptoms?**

| Sensitivity     |                                               | 0.51 to 0.69              |                                                 | Baseline<br>Prevalence | 20%                            |                          | 50%                               |                                  |                             |                      |
|-----------------|-----------------------------------------------|---------------------------|-------------------------------------------------|------------------------|--------------------------------|--------------------------|-----------------------------------|----------------------------------|-----------------------------|----------------------|
| Specificity     |                                               | 0.28 to 0.76              |                                                 |                        | Typically seen in primary care |                          | Typically seen in specialist care |                                  |                             |                      |
| Outcome         | № of studies (№ of patients)                  | Study design              | Factors that may decrease certainty of evidence |                        |                                |                          |                                   | Effect per 1.000 patients tested |                             | Test accuracy<br>QoE |
|                 |                                               |                           | Risk of bias                                    | Indirectness           | Inconsistency                  | Imprecision              | Publication bias                  | pre-test probability of 20%      | pre-test probability of 50% |                      |
| True positives  | 4 studies <sup>1,2,3,4</sup><br>1451 patients | diagnostic accuracy study | serious <sup>a</sup>                            | not serious            | serious <sup>b</sup>           | not serious <sup>c</sup> | none                              | 102 to 138                       | 255 to 345                  | ⊕⊕○○<br>LOW          |
| False negatives |                                               |                           |                                                 |                        |                                |                          |                                   | 62 to 98                         | 155 to 245                  |                      |
| True negatives  | 4 studies <sup>1,2,3,4</sup><br>1451 patients | diagnostic accuracy study | serious <sup>a</sup>                            | not serious            | serious <sup>b</sup>           | not serious <sup>c</sup> | none                              | 224 to 608                       | 140 to 380                  | ⊕⊕○○<br>LOW          |
| False positives |                                               |                           |                                                 |                        |                                |                          |                                   | 192 to 576                       | 120 to 360                  |                      |

### Explanations

- a. Limitations in the selection of patients with suspected disease. Spectrum bias potentially leads to inflated estimation of the diagnostic performance.
- b. Pooled data could not be obtained and is represented as a range. Probably due to a threshold effect – accuracy values represent best balance between sensitivity and specificity at a cut-off around FEV<sub>1</sub>/FVC ratio of 77%. Specificity and absolute TN and FP effects per 1000 patients tested are highly variable.
- c. Imprecision of data is mainly due to heterogeneity of data and representation of ranges instead of pooled data.
- Serious: The more serious the limitation are, the more likely is that the quality of evidence will be downgraded

### References

1. Nekoe H., Graulich E., Schleich F., Guissard F., Paulus V., Henket M., et al. (2020) Are type-2 biomarkers of any help in asthma diagnosis? ERJ Open Res 6:(2):00169–02020
2. Hunter CJ., Brightling CE., Woltmann G., Wardlaw AJ., Pavord ID. (2002) A Comparison of the Validity of Different Diagnostic Tests in Adults With Asthma. Chest 121:(4):1051–1057
3. Bougard N, Nekoe H, Schleich F, Guissard F, Paulus V, Donneau AF, Louis R. Assessment of diagnostic accuracy of lung function indices and FeNO for a positive methacholine challenge. Biochem Pharmacol. 2020 Sep;179:113981.
4. Stanbrook MB, Chapman KR, Kesten S. Gas trapping as a predictor of positive methacholine challenge in patients with normal spirometry results. Chest. 1995 Apr;107(4):992-5.

**Table 7: GRADE table: Can Peak Expiratory Flow Variability testing help diagnose asthma in patients with episodic/chronic suggestive symptoms ?**

|             |              |                     |  |                                |                                   |
|-------------|--------------|---------------------|--|--------------------------------|-----------------------------------|
| Sensitivity | 0.05 to 0.93 | Baseline Prevalence |  | 20%                            | 50%                               |
| Specificity | 0.75 to 1.00 |                     |  | Typically seen in primary care | Typically seen in specialist care |

  

| Outcome                | No of studies (No of patients)                    | Study design              | Factors that may decrease certainty of evidence |                            |                      |                          |                  | Effect per 1,000 patients tested |                             | Test accuracy QoE |
|------------------------|---------------------------------------------------|---------------------------|-------------------------------------------------|----------------------------|----------------------|--------------------------|------------------|----------------------------------|-----------------------------|-------------------|
|                        |                                                   |                           | Risk of bias                                    | Indirectness               | Inconsistency        | Imprecision              | Publication bias | pre-test probability of 20%      | pre-test probability of 50% |                   |
| <b>True positives</b>  | 6 studies <sup>1,2,3,4,5,6</sup><br>1372 patients | diagnostic accuracy study | serious <sup>a</sup>                            | not serious <sup>b,c</sup> | serious <sup>d</sup> | not serious <sup>e</sup> | none             | 10 to 186                        | 25 to 465                   | ⊕⊕○○<br>LOW       |
| <b>False negatives</b> |                                                   |                           |                                                 |                            |                      |                          |                  | 14 to 190                        | 35 to 475                   |                   |
| <b>True negatives</b>  | 6 studies <sup>1,2,3,4,5,6</sup><br>1372 patients | diagnostic accuracy study | serious <sup>a</sup>                            | not serious <sup>b,c</sup> | serious <sup>d</sup> | not serious <sup>e</sup> | none             | 600 to 800                       | 375 to 500                  | ⊕⊕○○<br>LOW       |
| <b>False positives</b> |                                                   |                           |                                                 |                            |                      |                          |                  | 0 to 200                         | 0 to 125                    |                   |

### Explanations

- a. Limitations in the selection of patients with suspected disease. Spectrum bias potentially leads to inflated estimation of the diagnostic performance.
- b. Confidence not limited due to indirectness although 1 study included patients aged >7, 1 study included patients aged 13-23
- c. Confidence not limited due to indirectness although 1 study selected patients with symptoms of cough only and 1 study 46% of patients on ICS whilst being tested
- d. Pooled data could not be obtained and is represented as a range. Sensitivity, specificity and absolute effects per 1000 patients tested are highly variable.
- e. Imprecision of data is mainly due to heterogeneity of data and representation of ranges instead of pooled data.
- Serious: The more serious the limitation are, the more likely is that the quality of evidence will be downgraded

### References

- Goldstein, . Comparisons of Peak Diurnal Expiratory Flow Variation, Postbronchodilator FEV1 Responses, and Methacholine Inhalation Challenges in the Evaluation of Suspected Asthma. Chest ; 2001.
- Ulrik, . Recognition of Asthma in Adolescents and Young Adults: Which Objective Measure is Best?. Journal of Asthma; 2005.

3. Thiadens, . Value of measuring diurnal peak flow variability in the recognition of asthma: a study in general practice. ERJ; 1998.
4. Nair, . Use of peak flow variability and methacholine responsiveness in predicting changes from pre-test diagnosis of asthma. ERJ; 1999.
5. Otter, . Testing bronchial hyper-responsiveness: provocation or peak expiratory flow variability?. British Journal of General Practice,; 1997.
6. Hunter CJ, Brightling CE, Woltmann G, Wardlaw AJ, Pavord ID.. A comparison of the validity of different diagnostic tests in adults with asthma. Chest; 2002.

**Table 8a: GRADE table: Can FeNO (25 ppb) help diagnose asthma in adults with episodic/chronic suggestive symptoms?**

| Sensitivity     | 0.53 (95% CI: 0.33 to 0.72)                       |                           | Baseline<br>Prevalence                          | 20%                            |                      | 50%                               |                  |                                  |                             |                      |
|-----------------|---------------------------------------------------|---------------------------|-------------------------------------------------|--------------------------------|----------------------|-----------------------------------|------------------|----------------------------------|-----------------------------|----------------------|
| Specificity     | 0.72 (95% CI: 0.61 to 0.81)                       |                           |                                                 | Typically seen in primary care |                      | Typically seen in specialist care |                  |                                  |                             |                      |
| Outcome         | № of studies (№ of patients)                      | Study design              | Factors that may decrease certainty of evidence |                                |                      |                                   |                  | Effect per 1.000 patients tested |                             | Test accuracy<br>QoE |
|                 |                                                   |                           | Risk of bias                                    | Indirectness                   | Inconsistency        | Imprecision                       | Publication bias | pre-test probability of 20%      | pre-test probability of 50% |                      |
| True positives  | 6 studies <sup>1,2,3,4,5,6</sup><br>1535 patients | diagnostic accuracy study | not serious <sup>a</sup>                        | not serious                    | serious <sup>b</sup> | not serious <sup>c</sup>          | none             | 106 (66 to 144)                  | 265 (165 to 360)            | ⊕⊕⊕○<br>MODERATE     |
| False negatives |                                                   |                           |                                                 |                                |                      |                                   |                  | 94 (56 to 134)                   | 235 (140 to 335)            |                      |
| True negatives  | 6 studies <sup>1,2,3,4,5,6</sup><br>1535 patients | diagnostic accuracy study | not serious <sup>a</sup>                        | not serious                    | serious <sup>b</sup> | not serious <sup>c</sup>          | none             | 576 (488 to 648)                 | 360 (305 to 405)            | ⊕⊕⊕○<br>MODERATE     |
| False positives |                                                   |                           |                                                 |                                |                      |                                   |                  | 224 (152 to 312)                 | 140 (95 to 195)             |                      |

### Explanations

a. Following the Quadas2 assessment of risk of bias, despite patient selection was not totally homogenous in the included studies, the study design, index test, reference standard and flow and timing were similar in all the included studies.

b. Sensitivity, specificity and absolute effects per 1000 patients tested are highly variable across different studies using same cut-off (25 ppb).

c. Imprecision of data is mainly due to heterogeneity

Serious: The more serious the limitation are, the more likely is that the quality of evidence will be downgraded

## References

1. Arora R, Thornblade CE, Dauby PA, Flanagan JW, Bush AC, Hagan LL. Exhaled nitric oxide levels in military recruits with new onset asthma. *Allergy Asthma Proc.* 2006 Nov-Dec;27(6):493-8. doi: 10.2500/aap.2006.27.2904. PMID: 17176784.
2. Nekoe H, Graulich E, Schleich F, et al. Are type-2 biomarkers of any help in asthma diagnosis? *ERJ Open Res* 2020; 6: 00169-2020
3. Heffler E, Guida G, Marsico P, Bergia R, Bommarito L, Ferrero N, Nebiolo F, De Stefani A, Usai A, Bucca C, Rolla G. Exhaled nitric oxide as a diagnostic test for asthma in rhinitic patients with asthmatic symptoms. *Respir Med.* 2006 Nov;100(11):1981-7. doi: 10.1016/j.rmed.2006.02.019. Epub 2006 Apr 3. PMID: 16584881.
4. Katsoulis K, Ganavias L, Michailopoulos P, Bikas C, Dinapogias E, Kontakiotis T, Kostikas K, Loukides S. Exhaled nitric oxide as screening tool in subjects with suspected asthma without reversibility. *Int Arch Allergy Immunol.* 2013;162(1):58-64. doi: 10.1159/000350221. Epub 2013 Jun 26. PMID: 23816757.
5. Malinovschi A, Backer V, Harving H, Porsbjerg C. The value of exhaled nitric oxide to identify asthma in smoking patients with asthma-like symptoms. *Respir Med.* 2012 Jun;106(6):794-801. doi: 10.1016/j.rmed.2012.02.009. Epub 2012 Mar 8. PMID: 22405608.
6. Schneider A, Schwarzbach J, Faderl B, Welker L, Karsch-Völkl M, Jörres RA. FENO measurement and sputum analysis for diagnosing asthma in clinical practice. *Respir Med.* 2013 Feb;107(2):209-16. doi: 10.1016/j.rmed.2012.10.003. Epub 2012 Oct 27. PMID: 23107283.

**Table 8b: GRADE table: Can FeNO (40 ppb) help diagnose asthma in adults with episodic/chronic suggestive symptoms?**

| Sensitivity            | 0.61 (95% CI: 0.37 to 0.81)                       |                           | Baseline Prevalence                             | 20%<br>Typically seen in primary care | 50%<br>Typically seen in specialist care |                          |                  |                                  |                             |                   |
|------------------------|---------------------------------------------------|---------------------------|-------------------------------------------------|---------------------------------------|------------------------------------------|--------------------------|------------------|----------------------------------|-----------------------------|-------------------|
| Specificity            | 0.82 (95% CI: 0.75 to 0.87)                       |                           |                                                 |                                       |                                          |                          |                  |                                  |                             |                   |
| Outcome                | No of studies (No of patients)                    | Study design              | Factors that may decrease certainty of evidence |                                       |                                          |                          |                  | Effect per 1.000 patients tested |                             | Test accuracy QoE |
|                        |                                                   |                           | Risk of bias                                    | Indirectness                          | Inconsistency                            | Imprecision              | Publication bias | pre-test probability of 20%      | pre-test probability of 50% |                   |
| <b>True positives</b>  | 6 studies <sup>1,2,3,4,5,6</sup><br>1638 patients | diagnostic accuracy study | not serious <sup>a</sup>                        | not serious                           | serious <sup>b</sup>                     | not serious <sup>c</sup> | none             | 122 (74 to 162)                  | 305 (185 to 405)            | ⊕⊕⊕○<br>MODERATE  |
| <b>False negatives</b> |                                                   |                           |                                                 |                                       |                                          |                          |                  | 78 (38 to 126)                   | 195 (95 to 315)             |                   |
| <b>True negatives</b>  | 6 studies <sup>1,2,3,4,5,6</sup><br>1638 patients | diagnostic accuracy study | not serious <sup>a</sup>                        | not serious                           | serious <sup>b</sup>                     | not serious <sup>c</sup> | none             | 656 (600 to 696)                 | 410 (375 to 435)            | ⊕⊕⊕○<br>MODERATE  |
| <b>False positives</b> |                                                   |                           |                                                 |                                       |                                          |                          |                  | 144 (104 to 200)                 | 90 (65 to 125)              |                   |

#### Explanations

a. Following the Quadas2 assessment of risk of bias, despite patient selection was not totally homogenous in the included studies, the study design, index test, reference standard and flow and timing were similar in all the included studies.

b. Sensitivity, specificity and absolute effects per 1000 patients tested are highly variable across different studies using same cut-off (25 ppb).

c. Imprecision of data is mainly due to heterogeneity

Serious: The more serious the limitation are, the more likely is that the quality of evidence will be downgraded

#### References

1. Arora R, Thornblade CE, Dauby PA, Flanagan JW, Bush AC, Hagan LL. Exhaled nitric oxide levels in military recruits with new onset asthma. Allergy Asthma Proc. 2006 Nov-Dec;27(6):493-8. doi: 10.2500/aap.2006.27.2904. PMID: 17176784.
2. Heffler E, Guida G, Marsico P, Bergia R, Bommarito L, Ferrero N, Nebiolo F, De Stefani A, Usai A, Bucca C, Rolla G. Exhaled nitric oxide as a diagnostic test for asthma in rhinitic patients with asthmatic symptoms. Respir Med. 2006 Nov;100(11):1981-7. doi: 10.1016/j.rmed.2006.02.019. Epub 2006 Apr 3. PMID: 16584881.

3. Fukuhara A, Saito J, Sato S, Sato Y, Nikaido T, Saito K, Fukuhara-Nakagawa N, Inokoshi Y, Ishii T, Tanino Y, Ishida T, Munakata M. Validation study of asthma screening criteria based on subjective symptoms and fractional exhaled nitric oxide. *Ann Allergy Asthma Immunol*. 2011 Dec;107(6):480-6. doi: 10.1016/j.anai.2011.09.002. Epub 2011 Oct 1. PMID: 22123376.
4. Kowal K, Bodzenta-Lukaszyk A, Zukowski S. Exhaled nitric oxide in evaluation of young adults with chronic cough. *J Asthma*. 2009 Sep;46(7):692-8. doi: 10.1080/02770900903056187. PMID: 19728207.
5. Pedrosa M, Cancelliere N, Barranco P, López-Carrasco V, Quirce S. Usefulness of exhaled nitric oxide for diagnosing asthma. *J Asthma*. 2010 Sep;47(7):817-21. doi: 10.3109/02770903.2010.491147. PMID: 20718633.
6. Nekoe H, Graulich E, Schleich F, et al. Are type-2 biomarkers of any help in asthma diagnosis? *ERJ Open Res* 2020; 6: 00169-2020

**Table 8c: GRADE table: Can FeNO (50 ppb) help diagnose asthma in adults with episodic/chronic suggestive symptoms?**

|             |              |                        |                                       |                                          |
|-------------|--------------|------------------------|---------------------------------------|------------------------------------------|
| Sensitivity | 0.19 to 0.56 | Baseline<br>Prevalence | 20%<br>Typically seen in primary care | 50%<br>Typically seen in specialist care |
| Specificity | 0.77 to 0.95 |                        |                                       |                                          |

  

| Outcome                | No of studies (No of patients) | Study design              | Factors that may decrease certainty of evidence |              |                          |                      |                  | Effect per 1.000 patients tested |                             | Test accuracy<br>QoE |
|------------------------|--------------------------------|---------------------------|-------------------------------------------------|--------------|--------------------------|----------------------|------------------|----------------------------------|-----------------------------|----------------------|
|                        |                                |                           | Risk of bias                                    | Indirectness | Inconsistency            | Imprecision          | Publication bias | pre-test probability of 20%      | pre-test probability of 50% |                      |
| <b>True positives</b>  | 3 studies<br>858 patients      | diagnostic accuracy study | not serious <sup>a</sup>                        | not serious  | not serious <sup>b</sup> | serious <sup>c</sup> | none             | 38 to 112                        | 95 to 278                   | ⊕⊕⊕○<br>MODERATE     |
| <b>False negatives</b> |                                |                           |                                                 |              |                          |                      |                  | 88 to 162                        | 222 to 405                  |                      |
| <b>True negatives</b>  | 3 studies<br>858 patients      | diagnostic accuracy study | not serious <sup>a</sup>                        | not serious  | not serious <sup>b</sup> | serious <sup>c</sup> | none             | 616 to 760                       | 384 to 475                  | ⊕⊕⊕○<br>MODERATE     |
| <b>False positives</b> |                                |                           |                                                 |              |                          |                      |                  | 40 to 184                        | 25 to 116                   |                      |

### Explanations

a. Following the Quadas2 assessment of risk of bias, despite the interpretation of the index test could have introduced some bias in 2/3 studies, the study design, reference standard and flow and timing were similar in all the included studies.

b. Pooled data could not be obtained and is represented as a range. Sensitivity, specificity and absolute effects per 1000 patients tested are highly variable.

c. Imprecision of data is mainly due to heterogeneity of data and representation of ranges instead of pooled data.

Serious: The more serious the limitation are, the more likely is that the quality of evidence will be downgraded

### References

1. Heffler E, Guida G, Marsico P, Bergia R, Bommarito L, Ferrero N, Nebiolo F, De Stefani A, Usai A, Bucca C, Rolla G. Exhaled nitric oxide as a diagnostic test for asthma in rhinitic patients with asthmatic symptoms. *Respir Med*. 2006 Nov;100(11):1981-7. doi: 10.1016/j.rmed.2006.02.019. Epub 2006 Apr 3. PMID: 16584881.
2. Malinovschi A, Backer V, Harving H, Porsbjerg C. The value of exhaled nitric oxide to identify asthma in smoking patients with asthma-like symptoms. *Respir Med*. 2012 Jun;106(6):794-801. doi: 10.1016/j.rmed.2012.02.009. Epub 2012 Mar 8. PMID: 22405608.

3. Nekoe H, Graulich E, Schleich F, et al. Are type-2 biomarkers of any help in asthma diagnosis? ERJ Open Res 2020; 6: 00169-2020



**Table 9: GRADE table: Can measuring blood eosinophil count help diagnose asthma in adults with episodic/chronic suggestive symptoms?**

|             |              |                        |                                       |                                          |
|-------------|--------------|------------------------|---------------------------------------|------------------------------------------|
| Sensitivity | 0.15 to 0.59 | Baseline<br>Prevalence | 20%<br>Typically seen in primary care | 50%<br>Typically seen in specialist care |
| Specificity | 0.39 to 1.00 |                        |                                       |                                          |

  

| Outcome                | No of studies (No of patients)                  | Study design              | Factors that may decrease certainty of evidence |              |                      |                          |                  | Effect per 1.000 patients tested |                             | Test accuracy<br>QoE |
|------------------------|-------------------------------------------------|---------------------------|-------------------------------------------------|--------------|----------------------|--------------------------|------------------|----------------------------------|-----------------------------|----------------------|
|                        |                                                 |                           | Risk of bias                                    | Indirectness | Inconsistency        | Imprecision              | Publication bias | pre-test probability of 20%      | pre-test probability of 50% |                      |
| <b>True positives</b>  | 5 studies <sup>1,2,3,4,5</sup><br>1286 patients | diagnostic accuracy study | serious <sup>a</sup>                            | not serious  | serious <sup>b</sup> | not serious <sup>c</sup> | none             | 30 to 118                        | 75 to 295                   | ⊕⊕○○<br>LOW          |
| <b>False negatives</b> |                                                 |                           |                                                 |              |                      |                          |                  | 82 to 170                        | 205 to 425                  |                      |
| <b>True negatives</b>  | 5 studies <sup>1,2,3,4,5</sup><br>1286 patients | diagnostic accuracy study | serious <sup>a</sup>                            | not serious  | serious <sup>b</sup> | not serious <sup>c</sup> | none             | 312 to 800                       | 195 to 500                  | ⊕⊕○○<br>LOW          |
| <b>False positives</b> |                                                 |                           |                                                 |              |                      |                          |                  | 0 to 488                         | 0 to 305                    |                      |

### Explanations

a. Limitations in the selection of patients with suspected disease. Spectrum bias potentially leads to inflated estimation of the diagnostic performance.

b. Pooled data could not be obtained and is represented as a range. Sensitivity, specificity and absolute effects per 1000 patients tested are highly variable. Probably due to a threshold effect – accuracy values represent best balance between sensitivity and specificity typically at a cut-off between 4 and 6%.

c. Imprecision of data is mainly due to heterogeneity of data and representation of ranges instead of pooled data.

Serious: The more serious the limitation are, the more likely is that the quality of evidence will be downgraded

### References

1. Popović-Grle S., Mehulić M., Pavčić F., Babić I., Beg-Zec Z. (2002) Clinical validation of bronchial hyperresponsiveness, allergy tests and lung function in the diagnosis of asthma in persons with dyspnea. Coll Antropol 26 Suppl:119–27
2. Yurdakul AS., Dursun B., Canbakan S., Çakaloğlu A., Çapan N. (2005) The Assessment of Validity of Different Asthma Diagnostic Tools in Adults. J Asthma 42:(10):843–846
- Hunter CJ., Brightling CE., Woltmann G., Wardlaw AJ., Pavord ID. (2002) A Comparison of the Validity of Different Diagnostic Tests in Adults With Asthma. Chest 121:(4):1051–1057

3. Tilemann L., Gindner L., Meyer F., Szecsenyi J., Schneider A. (2011) Differences in local and systemic inflammatory markers in patients with obstructive airways disease. *Prim Care Respir J* 20:(4):407–413
4. Nekoe H., Graulich E., Schleich F., Guissard F., Paulus V., Henket M., et al. (2020) Are type-2 biomarkers of any help in asthma diagnosis? *ERJ Open Res* 6:(2):00169–02020

**Table 10: GRADE table: Can measuring total serum IgE be used to diagnose asthma in adults with episodic/chronic suggestive symptoms?**

|             |              |                        |                                       |                                          |
|-------------|--------------|------------------------|---------------------------------------|------------------------------------------|
| Sensitivity | 0.33 to 0.51 | Baseline<br>Prevalence | 20%<br>Typically seen in primary care | 50%<br>Typically seen in specialist care |
| Specificity | 0.72 to 0.85 |                        |                                       |                                          |

  

| Outcome                | No of studies (No of patients)                | Study design              | Factors that may decrease certainty of evidence |              |                      |                          |                  | Effect per 1.000 patients tested |                             | Test accuracy<br>QoE |
|------------------------|-----------------------------------------------|---------------------------|-------------------------------------------------|--------------|----------------------|--------------------------|------------------|----------------------------------|-----------------------------|----------------------|
|                        |                                               |                           | Risk of bias                                    | Indirectness | Inconsistency        | Imprecision              | Publication bias | pre-test probability of 20%      | pre-test probability of 50% |                      |
| <b>True positives</b>  | 4 studies <sup>1,2,3,4</sup><br>1176 patients | diagnostic accuracy study | serious <sup>a</sup>                            | not serious  | serious <sup>b</sup> | not serious <sup>c</sup> | none             | 66 to 102                        | 164 to 255                  | ⊕⊕○○<br>LOW          |
| <b>False negatives</b> |                                               |                           |                                                 |              |                      |                          |                  | 98 to 134                        | 245 to 336                  |                      |
| <b>True negatives</b>  | 4 studies <sup>1,2,3,4</sup><br>1176 patients | diagnostic accuracy study | serious <sup>a</sup>                            | not serious  | not serious          | not serious <sup>c</sup> | none             | 576 to 680                       | 360 to 425                  | ⊕⊕⊕○<br>MODERATE     |
| <b>False positives</b> |                                               |                           |                                                 |              |                      |                          |                  | 120 to 224                       | 75 to 140                   |                      |

### Explanations

a. Limitations in the selection of patients with suspected disease. Spectrum bias potentially leads to inflated estimation of the diagnostic performance.

b. Pooled data could not be obtained and is represented as a range. Sensitivity, specificity and absolute effects per 1000 patients tested are highly variable. Probably due to a threshold effect – accuracy values represent best balance between sensitivity and specificity typically at a cut-off between 90-132 U/mL

c. Imprecision of data is mainly due to heterogeneity of data and representation of ranges instead of pooled data.

Serious: The more serious the limitation are, the more likely is that the quality of evidence will be downgraded

### References

1. Popović-Grle S., Mehulić M., Pavčić F., Babić I., Beg-Zec Z. (2002) Clinical validation of bronchial hyperresponsiveness, allergy tests and lung function in the diagnosis of asthma in persons with dyspnea. Coll Antropol 26 Suppl:119–27
2. Yurdakul AS., Dursun B., Canbakan S., Çakaloğlu A., Çapan N. (2005) The Assessment of Validity of Different Asthma Diagnostic Tools in Adults. J Asthma 42:(10):843–846

3. Tilemann L., Gindner L., Meyer F., Szecsenyi J., Schneider A. (2011) Differences in local and systemic inflammatory markers in patients with obstructive airways disease. Prim Care Respir J 20:(4):407–413
4. Nekoe H., Graulich E., Schleich F., Guissard F., Paulus V., Henket M., et al. (2020) Are type-2 biomarkers of any help in asthma diagnosis? ERJ Open Res 6:(2):00169–02020

**Table 11: GRADE table: Can combining FeNO, blood eosinophils and IgE help diagnose asthma in adults with episodic/chronic suggestive symptoms?**

|             |                             |                        |                                       |                                          |
|-------------|-----------------------------|------------------------|---------------------------------------|------------------------------------------|
| Sensitivity | 0.46 (95% CI: 0.37 to 0.52) | Baseline<br>Prevalence | 20%<br>Typically seen in primary care | 50%<br>Typically seen in specialist care |
| Specificity | 0.74 (95% CI: 0.64 to 0.69) |                        |                                       |                                          |

  

| Outcome                | No of studies (No of patients)                    | Study design              | Factors that may decrease certainty of evidence |              |               |             |                  | Effect per 1.000 patients tested |                             | Test accuracy<br>QoE |
|------------------------|---------------------------------------------------|---------------------------|-------------------------------------------------|--------------|---------------|-------------|------------------|----------------------------------|-----------------------------|----------------------|
|                        |                                                   |                           | Risk of bias                                    | Indirectness | Inconsistency | Imprecision | Publication bias | pre-test probability of 20%      | pre-test probability of 50% |                      |
| <b>True positives</b>  | 1 studies <sup>1</sup><br>702 patients            | diagnostic accuracy study | serious <sup>a</sup>                            | not serious  | not serious   | not serious | none             | 92 (74 to 104)                   | 230 (185 to 260)            | ⊕⊕⊕○<br>MODERATE     |
| <b>False negatives</b> |                                                   |                           |                                                 |              |               |             |                  | 108 (96 to 126)                  | 270 (240 to 315)            |                      |
| <b>True negatives</b>  | 6 studies <sup>1,2,3,4,5,6</sup><br>1638 patients | diagnostic accuracy study | serious <sup>a</sup>                            | not serious  | not serious   | not serious | none             | 592 (512 to 552)                 | 370 (320 to 345)            | ⊕⊕⊕○<br>MODERATE     |
| <b>False positives</b> |                                                   |                           |                                                 |              |               |             |                  | 208 (248 to 288)                 | 130 (155 to 180)            |                      |

### Explanations

- a. Limitations in the selection of patients with suspected disease. Spectrum bias potentially leads to inflated estimation of the diagnostic performance.  
 Serious: The more serious the limitation are, the more likely is that the quality of evidence will be downgraded

### References

1. Nekoe H., Graulich E., Schleich F., Guissard F., Paulus V., Henket M., et al. (2020) Are type-2 biomarkers of any help in asthma diagnosis? ERJ Open Res 6:(2):00169–02020

**Table 12: GRADE table: Can Bronchial Challenge Testing help diagnose asthma in patients with episodic/chronic symptoms suggestive of asthma?**

|             |              |  |  |  |  |
|-------------|--------------|--|--|--|--|
| Sensitivity | 0.63 to 1.00 |  |  |  |  |
| Specificity | 0.07 to 0.95 |  |  |  |  |

|             |     |     |  |
|-------------|-----|-----|--|
| Prevalences | 20% | 50% |  |
|-------------|-----|-----|--|

| Outcome                                                                          | N <sub>e</sub> of studies (N <sub>e</sub> of patients) | Study design                       | Factors that may decrease certainty of evidence |                          |                          |                          |                  | Effect per 100 patients tested |                             | Test accuracy CoE |
|----------------------------------------------------------------------------------|--------------------------------------------------------|------------------------------------|-------------------------------------------------|--------------------------|--------------------------|--------------------------|------------------|--------------------------------|-----------------------------|-------------------|
|                                                                                  |                                                        |                                    | Risk of bias                                    | Indirectness             | Inconsistency            | Imprecision              | Publication bias | pre-test probability of 20%    | pre-test probability of 50% |                   |
| <b>True positives</b><br>(patients with Asthma)                                  | 3 studies<br>891 patients                              | cohort & case-control type studies | serious <sup>1,2,3,a,b</sup>                    | not serious <sup>c</sup> | not serious <sup>d</sup> | not serious              | none             | 13 to 20                       | 32 to 50                    | ⊕⊕⊕○<br>Moderate  |
| <b>False negatives</b><br>(patients incorrectly classified as not having Asthma) |                                                        |                                    |                                                 |                          |                          |                          |                  | 0 to 7                         | 0 to 18                     |                   |
| <b>True negatives</b><br>(patients without Asthma)                               | 3 studies<br>891 patients                              | cohort & case-control type studies | serious <sup>a,b</sup>                          | not serious <sup>c</sup> | serious <sup>d,e</sup>   | not serious <sup>e</sup> | none             | 6 to 76                        | 4 to 48                     | ⊕⊕○○<br>Low       |
| <b>False positives</b><br>(patients incorrectly classified as having Asthma)     |                                                        |                                    |                                                 |                          |                          |                          |                  | 4 to 74                        | 2 to 46                     |                   |

#### Explanations

- a. 2 prospective case control studies, 1 retrospective database study  
b. Louis et al retrospective - a total of 1610 patients were screened to select 194 who had both BDR and Methacholine  
c. Ulrik et al study conducted in general population and not secondary care  
d. 1 study used 8mg/ml and 16mg/ml methacholine cut-off, 2 studies used 16mg/ml cut-off for methacholine/histamine challenge  
e. Specificity highly variable from 0.07-95

#### References

1. Porpodis, . Comparison of diagnostic validity of mannitol and methacholine challenges and relationship to clinical status and airway inflammation in steroid naïve asthmatic patients.. Journal of Asthma; 2017.  
2. Louis, . Bronchodilation Test with Inhaled Salbutamol Versus Bronchial Methacholine Challenge to Make an Asthma Diagnosis: Do They Provide the Same Information?. JACI in Practice; 2019.  
3. Ulrik, . Recognition of Asthma in Adolescents and Young Adults: Which Objective Measure is Best?. Journal of Asthma; 2005.

**Table 13: GRADE table: Can sGAW measurement help diagnose asthma in adults with episodic/chronic suggestive symptoms?**

|             |              |                     |                                       |                                          |
|-------------|--------------|---------------------|---------------------------------------|------------------------------------------|
| Sensitivity | 0.50 to 0.51 | Baseline Prevalence | 20%<br>Typically seen in primary care | 50%<br>Typically seen in specialist care |
| Specificity | 0.71 to 0.74 |                     |                                       |                                          |

  

| Outcome                | No of studies (No of patients) | Study design              | Factors that may decrease certainty of evidence |                      |               |             |                  | Effect per 1.000 patients tested |                             | Test accuracy QoE |
|------------------------|--------------------------------|---------------------------|-------------------------------------------------|----------------------|---------------|-------------|------------------|----------------------------------|-----------------------------|-------------------|
|                        |                                |                           | Risk of bias                                    | Indirectness         | Inconsistency | Imprecision | Publication bias | pre-test probability of 20%      | pre-test probability of 50% |                   |
| <b>True positives</b>  | 2 studies <sup>1,2</sup>       | diagnostic accuracy study | serious <sup>a</sup>                            | serious <sup>b</sup> | not serious   | not serious | none             | 100 to 102                       | 250 to 255                  | ⊕⊕○<br>○<br>LOW   |
| <b>False negatives</b> | 921 patients                   |                           |                                                 |                      |               |             |                  | 98 to 100                        | 245 to 250                  |                   |
| <b>True negatives</b>  | 2 studies <sup>1,2</sup>       | diagnostic accuracy study | serious <sup>a</sup>                            | serious <sup>b</sup> | not serious   | not serious | none             | 568 to 592                       | 355 to 370                  | ⊕⊕○<br>○<br>LOW   |
| <b>False positives</b> | 921 patients                   |                           |                                                 |                      |               |             |                  | 208 to 232                       | 130 to 145                  |                   |

## Explanations

a. Limitations in the selection of patients with suspected disease. Spectrum bias potentially leads to inflated estimation of the diagnostic performance.

b. Topalovic 2015 included patients with obstructive disease including COPD and bronchiectasis. The diagnosis of asthma was unclear and the authors focused on non-obstructive asthma

Serious: The more serious the limitation are, the more likely is that the quality of evidence will be downgraded

## References

1. Bougard N, Nekoe H, Schleich F, Guissard F, Paulus V, Donneau AF, Louis R. Assessment of diagnostic accuracy of lung function indices and FeNO for a positive methacholine challenge. *Biochem Pharmacol.* 2020 Sep;179:113981.

2. Topalovic M, Derom E, Osadnik CR, Troosters T, Decramer M, Janssens W; Belgian Pulmonary Function Study Investigators. Airways resistance and specific conductance for the diagnosis of obstructive airways diseases. *Respir Res.* 2015 Jul 22;16(1):88.

**Table 14: GRADE table: Can RV/TLC measurement help diagnose asthma in adults with episodic/chronic suggestive symptoms ?**

|             |              |                     |                                       |                                          |
|-------------|--------------|---------------------|---------------------------------------|------------------------------------------|
| Sensitivity | 0.28 to 0.71 | Baseline Prevalence | 20%<br>Typically seen in primary care | 50%<br>Typically seen in specialist care |
| Specificity | 0.68 to 0.88 |                     |                                       |                                          |

| Outcome                | No of studies (No of patients) | Study design              | Factors that may decrease certainty of evidence |              |                      |                          |                  | Effect per 1.000 patients tested |                             | Test accuracy QoE                                                                                                                                                                 |
|------------------------|--------------------------------|---------------------------|-------------------------------------------------|--------------|----------------------|--------------------------|------------------|----------------------------------|-----------------------------|-----------------------------------------------------------------------------------------------------------------------------------------------------------------------------------|
|                        |                                |                           | Risk of bias                                    | Indirectness | Inconsistency        | Imprecision              | Publication bias | pre-test probability of 20%      | pre-test probability of 50% |                                                                                                                                                                                   |
| <b>True positives</b>  | 2 studies <sup>1,2</sup>       | diagnostic accuracy study | serious <sup>a</sup>                            | not serious  | serious <sup>b</sup> | not serious <sup>c</sup> | none             | 56 to 142                        | 140 to 355                  | <br><br>LOW |
| <b>False negatives</b> | 770 patients                   |                           |                                                 |              |                      |                          |                  | 58 to 144                        | 145 to 360                  |                                                                                                                                                                                   |
| <b>True negatives</b>  | 2 studies <sup>1,2</sup>       | diagnostic accuracy study | serious <sup>a</sup>                            | not serious  | serious <sup>b</sup> | not serious <sup>c</sup> | none             | 544 to 704                       | 340 to 440                  | <br><br>LOW |
| <b>False positives</b> | 770 patients                   |                           |                                                 |              |                      |                          |                  | 96 to 256                        | 60 to 160                   |                                                                                                                                                                                   |

### Explanations

- Limitations in the selection of patients with suspected disease. Spectrum bias potentially leads to inflated estimation of the diagnostic performance.
  - Pooled data could not be obtained and is represented as a range. Probably due to a threshold effect – accuracy values represent best balance between sensitivity and specificity at a cut-off around RV/TLC ratio of 102 to >125%. Absolute effects per 1000 patients tested are highly variable.
  - Imprecision of data is mainly due to heterogeneity of data and representation of ranges instead of pooled data.
- Serious: The more serious the limitation are, the more likely is that the quality of evidence will be downgraded

### References

- Bougard N, Nekoe H, Schleich F, Guissard F, Paulus V, Donneau AF, Louis R. Assessment of diagnostic accuracy of lung function indices and FeNO for a positive methacholine challenge. *Biochem Pharmacol*. 2020 Sep;179:113981.
- Stanbrook MB, Chapman KR, Kesten S. Gas trapping as a predictor of positive methacholine challenge in patients with normal spirometry results. *Chest*. 1995 Apr;107(4):992-5.
