# Supplementary material
Source: HighWire-hosted journal article supplement (https://erj.ersjournals.com/content/60/3/2101585)
Supplement: inline-supplementary-material-2 [file inline-supplementary-material-2.pdf]

**Supplementary Table S1: Task Force and PICO group composition**

| <b>Name</b>                  | <b>Email</b>                      | <b>Affiliation</b>                                | <b>Country</b> | <b>Expertise</b>                                    | <b>Function</b>                                                                    |
|------------------------------|-----------------------------------|---------------------------------------------------|----------------|-----------------------------------------------------|------------------------------------------------------------------------------------|
| <b>Renaud Louis</b>          | r.louis@uliege.be                 | CHU Liege,<br>University of Liege                 | Belgium        | Chest physician,<br>Senior                          | Chair<br>Coordination of meetings and drafting manuscript<br>Supervision of PICO 5 |
| <b>Omar Usmani</b>           | o.usmani@imperial.ac.uk           | Imperial College<br>London                        | UK             | Chest physician,<br>Senior                          | Co-Chair<br>Coordination of meetings and drafting manuscript                       |
| <b>Matteo Bonini</b>         | matteobonini@tiscali.it           | Sapienza University<br>Rome                       | Italy          | Chest physician,<br>Junior                          | WG leader for PICO 4 and 5                                                         |
| <b>Inigo Ojanguren</b>       | iojanguren@vhebron.net            | Vall d'Hebron University<br>Hospital<br>Barcelona | Spain          | Chest physician,<br>Junior                          | WG leader for PICO 3 and 6<br>Narrative on phenotyping                             |
| <b>Imran Satia</b>           | imransatia@gmail.com              | McMaster University,<br>Hamilton                  | Canada         | Chest physician,<br>Junior                          | WG leader for PICO 2 and 7                                                         |
| <b>Florence Schleich</b>     | fschleich@chuliege.be             | CHU Liege,<br>University of Liege                 | Belgium        | Chest physician,<br>Junior                          | WG leader for PICO 1 and 8                                                         |
| <b>Courtney Coleman</b>      | courtney.coleman@europeanlung.org | European Lung<br>Foundation                       | UK             | European Lung<br>Foundation (ELF)<br>representative | Coordination of lay members<br>contributing to this task force                     |
| <b>Arnaud Bourdin</b>        | arnaud01009157@gmail.com          | University<br>Montpellier                         | France         | Chest physician,<br>Senior                          | Supervision of PICO 8<br>Narrative on lung imaging                                 |
| <b>Louis-Philippe Boulet</b> | lpboulet@med.ulaval.ca            | University<br>Laval<br>Quebec                     | Canada         | Chest physician,<br>Senior                          | Narrative on patients already<br>treated                                           |
| <b>Roland Buhl</b>           | Roland.Buhl@unimedizin-mainz.de   | University<br>Mainz                               | Germany        | Chest physician,<br>Senior                          | Supervision of PICO 2                                                              |
| <b>Marco Idzko</b>           | marco.idzko@meduniwien.ac.at      | University<br>Vienna                              | Austria        | Chest physician,<br>Senior                          | Member                                                                             |

|                             |                                |                                           |             |                          |                                                                                                                                                             |
|-----------------------------|--------------------------------|-------------------------------------------|-------------|--------------------------|-------------------------------------------------------------------------------------------------------------------------------------------------------------|
| Janwillem<br><b>Kocks</b>   | janwillem@gpri.nl              | General Practitioners Research Institute  | Netherlands | GP, Senior               | Supervision of PICO 3<br>Narrative on phenotyping                                                                                                           |
| Stelios<br><b>Loukides</b>  | loukstel@med.uoa.gr            | University of Athens                      | Greece      | Chest physician, Senior  | Narrative on phenotyping                                                                                                                                    |
| Alberto<br><b>Papi</b>      | ppa@unife.it                   | University Ferrara                        | Italy       | Chest physician, Senior  | Member                                                                                                                                                      |
| Celeste<br><b>Porsbjerg</b> | celeste.porsbjerg@regionh.dk   | Bispebjerg Hospital                       | Denmark     | Chest physician, Senior  | Supervision of PICO 1                                                                                                                                       |
| Joan<br><b>Soriano</b>      | jbsoriano2@gmail.com           | Hospital Universitario La Princesa Madrid | Spain       | Chest physician, Senior  | Supervision of PICO 4                                                                                                                                       |
| Daniel<br><b>Schuermans</b> | Daniel.Schuermans@uzbrussel.be | UZ Brussel VUB                            | Belgium     | Registered nurse, Senior | Member                                                                                                                                                      |
| Anneke<br><b>Ten brinke</b> | a.ten.brinke@znb.nl            | Medical Center Leeuwarden                 | Netherlands | Chest physician, Senior  | Supervision of PICO 7<br>Narrative on comorbidities                                                                                                         |
| Mike<br><b>Thomas</b>       | d.m.thomas@soton.ac.uk         | University Southampton                    | UK          | GP, Senior               | Supervision of PICO 6<br>Narrative on phenotyping                                                                                                           |
| Karen<br><b>Needham</b>     | auntykaz23@icloud.com          | Independent                               | UK          | Patient                  | Testimony of patient experience                                                                                                                             |
| David<br><b>Rigau</b>       | DRigau@santpau.cat             | ERS                                       | Spain       | ERS methodologist        | Overview of the process in GRADeing and formulation of recommendations<br>Supervision of Junior's work<br>Assistance in drafting<br><i>until March 2020</i> |
| Thomy<br><b>Tonia</b>       | thomy.tonia@ersnet.org         | ERS                                       | Switzerland | ERS methodologist        | Overview of the process in GRADeing and formulation of recommendations<br>Supervision of Junior's work<br>Assistance in drafting<br><i>from March 2020</i>  |
