# Supplementary material
Source: HighWire-hosted journal article supplement (https://erj.ersjournals.com/content/60/3/2101585)
Supplement: inline-supplementary-material-3 [file inline-supplementary-material-3.pdf]

| Online supplementary Table S2. Comparison with other asthma statements |                                                                                                                                                                                                                 |                                                                                                                                                 |                                                                                                                                                                                               |                                                                                                                                            |
|------------------------------------------------------------------------|-----------------------------------------------------------------------------------------------------------------------------------------------------------------------------------------------------------------|-------------------------------------------------------------------------------------------------------------------------------------------------|-----------------------------------------------------------------------------------------------------------------------------------------------------------------------------------------------|--------------------------------------------------------------------------------------------------------------------------------------------|
|                                                                        | ERS                                                                                                                                                                                                             | GINA                                                                                                                                            | NICE                                                                                                                                                                                          | NHBLI- NAEPP                                                                                                                               |
| <b>Care Setting</b>                                                    | Primary and Secondary Care                                                                                                                                                                                      | Primary and Secondary Care                                                                                                                      | Primary and Secondary Care                                                                                                                                                                    | Primary and Secondary Care                                                                                                                 |
| <b>Patient or Public Partners</b>                                      | Yes                                                                                                                                                                                                             | Yes                                                                                                                                             | Yes                                                                                                                                                                                           | Yes. Specific Focus Groups and Interviews                                                                                                  |
| <b>Panel Composition</b>                                               | European Lung Foundation<br>GPs<br>Respiratory Physicians<br>Respiratory Nurse                                                                                                                                  | Specialists<br>GP                                                                                                                               | Public Health Consultant<br>GPs<br>Asthma Nurse<br>Paediatricians<br>Pharmacist<br>Physiologist<br>Respiratory Physician                                                                      | Paediatric and Adults<br>Allergists/Pulmonologists<br>Internal, Family and<br>Emergency Medicine<br>Health Policy Experts                  |
| <b>Frequency</b>                                                       | First publication                                                                                                                                                                                               | Twice-Yearly Reviews                                                                                                                            | As Needed                                                                                                                                                                                     | Not Applicable                                                                                                                             |
| <b>Methodology</b>                                                     | PICO Framework<br>Systematic literature reviews<br>Meta-analyses<br>Risk of bias assessment with QUADAS Checklist<br>GRADE approach for assessing the quality of the evidence<br>Evidence to Decision Framework | Literature Search including previously conducted<br>Systematic Reviews<br>Individual and Committee Evaluation (Relevance, Quality, Reliability) | Systematic literature reviews<br>Meta-analyses<br>Risk of bias assessment with QUADAS Checklist<br>GRADE approach for assessing the quality of the evidence<br>Evidence to Decision Framework | Systematic literature reviews, Meta-analyses<br>GRADE approach for assessing the quality of the evidence<br>Evidence to Decision Framework |
| <b>Patient Population</b>                                              | Adults (>16 years old) with suspected asthma                                                                                                                                                                    | All ages with suspected asthma                                                                                                                  | All ages with suspected asthma                                                                                                                                                                | All ages with suspected asthma                                                                                                             |
| <b>Diagnostic Tests Evaluated or Included in Statement</b>             | <ul style="list-style-type: none"> <li>●Spirometry (FEV1/FVC&lt;LLN, 75%)</li> <li>●Peak Flow Variability</li> <li>●FeNO</li> <li>●Bloods Eosinophils</li> </ul>                                                | <ul style="list-style-type: none"> <li>●Symptoms</li> <li>FEV1/FVC&lt;LLN, <u>usually</u> &gt;0.75-0.80 in adults)</li> </ul>                   | <ul style="list-style-type: none"> <li>●Symptoms alone</li> <li>●History of Atopy</li> <li>●Exercise induced symptoms</li> <li>●Effects of Drugs: beta-blockers, aspirin, NSAIDs</li> </ul>   | <ul style="list-style-type: none"> <li>●FeNO</li> </ul>                                                                                    |

|                                     |                                                                                                                                                                                                                                  |                                                                                                                                                                                                                                                                                            |                                                                                                                                                                                                                                                                                                                                                |                                                                                                                    |
|-------------------------------------|----------------------------------------------------------------------------------------------------------------------------------------------------------------------------------------------------------------------------------|--------------------------------------------------------------------------------------------------------------------------------------------------------------------------------------------------------------------------------------------------------------------------------------------|------------------------------------------------------------------------------------------------------------------------------------------------------------------------------------------------------------------------------------------------------------------------------------------------------------------------------------------------|--------------------------------------------------------------------------------------------------------------------|
|                                     | <ul style="list-style-type: none"> <li>●Total IgE</li> <li>●Combination FeNO, Blood Eosinophils, IgE</li> <li>●Bronchial Challenge</li> <li>●Bronchodilator Reversibility</li> <li>●Airway Resistance sGaw and RV/TLC</li> </ul> | <ul style="list-style-type: none"> <li>●Bronchodilator Reversibility</li> <li>●Peak Flow</li> <li>●FeNO evaluated</li> <li>●Improvement in FEV1 after ICS (4-weeks)</li> <li>●FEV1 variability between visits</li> <li>●Blood Eosinophils for eligibility of biologic treatment</li> </ul> | <ul style="list-style-type: none"> <li>●Occupational Asthma</li> <li>●Spirometry/flow volume</li> <li>●Bronchodilator Reversibility</li> <li>●Peak Flow Variability</li> <li>●Skin Prick Testing</li> <li>●Total and Specific IgE</li> <li>●FeNO</li> <li>●Blood Eosinophils</li> <li>●Bronchial Challenges inc. Exercise Challenge</li> </ul> |                                                                                                                    |
| <b>Therapies Evaluated</b>          | No                                                                                                                                                                                                                               | Yes                                                                                                                                                                                                                                                                                        | Yes                                                                                                                                                                                                                                                                                                                                            | Yes                                                                                                                |
| <b>Independent Peer Reviewed</b>    | Yes                                                                                                                                                                                                                              | Sent out for open consultation.                                                                                                                                                                                                                                                            | Sent out for open consultation.                                                                                                                                                                                                                                                                                                                | Yes<br>Sent out for open consultation as well.<br>Reviewed by NIH and U.S. Department of Health and Human Services |
| <b>Intended Applicability</b>       | Global                                                                                                                                                                                                                           | Global                                                                                                                                                                                                                                                                                     | National Health Service (NHS), UK                                                                                                                                                                                                                                                                                                              | U.S.                                                                                                               |
| <b>Cost-Effectiveness Evaluated</b> | No                                                                                                                                                                                                                               | No                                                                                                                                                                                                                                                                                         | Yes                                                                                                                                                                                                                                                                                                                                            | No                                                                                                                 |
