# Supplementary material
Source: HighWire-hosted journal article supplement (https://erj.ersjournals.com/content/60/3/2101585)
Supplement: inline-supplementary-material-6 [file inline-supplementary-material-6.pdf]

**Online supplementary Table S4: Lung function indices performance to make a diagnosis of asthma**

| Index test                      | N                     | Setting           | Population                            | ICS treated | Reference                                                              | Asthma diagnosis N (%) | AUC              | Cut-off        | Sensitivity (%) | Specificity (%) | NPV (%) | PPV (%) | 95% specificity |
|---------------------------------|-----------------------|-------------------|---------------------------------------|-------------|------------------------------------------------------------------------|------------------------|------------------|----------------|-----------------|-----------------|---------|---------|-----------------|
| FEV <sub>1</sub> /FVC           |                       |                   |                                       |             |                                                                        |                        |                  |                |                 |                 |         |         |                 |
| Stanbrook Chest 1995            | 500                   | Secondary care    | Referred to laboratory lung function  | NA          | PC20 M < 8mg/ml                                                        |                        |                  | 90% predicted  | 53              | 28              | 24      | 57      | NA              |
| Hunter Chest 2002               | 89                    | Secondary care    | Asthma symptoms                       | 46%         | PC20M < 8 mg/ml or BdR 15% or ΔPEF20%                                  | 69 (77%)               | NA               | 77%            | 61 (49-72)      | 60 (38-81)      | 31      | 84      | NA              |
| Bougard Bioch Pharmacol 2020    | 129 training cohort   | Secondary care    | Referred to an asthma clinic          | 44%         | PC20M< 16 mg/ml                                                        | 85(66%)                | 0.63             | 77%            | 82              | 46              | 44      | 83      | NA              |
|                                 | 141 validation cohort | Secondary care    | Referred to an asthma clinic          | 47%         | PC20M< 16 mg/ml                                                        | 96 (68%)               | 0.68             | 79%            | 69              | 67              | 49      | 82      | NA              |
| Nekoe ERJ Open 2020             | 702                   | Secondary care    | Asthma symptoms                       | 0%          | PC20M< 8mg/ml or BdR 12%- and 200-ml improvement                       | 349 (50%)              | 0.67 (0.63-0.71) | 76%            | 51(42-57)       | 76 (68-81)      | 61      | 68      | 68%             |
| PEFR                            |                       |                   |                                       |             |                                                                        |                        |                  |                |                 |                 |         |         |                 |
| Den Otter Brit J Gen Pract 1997 | 318                   | Primary care      | Asthma symptoms                       | 0%          | BdR 9% predicted or PC20H < 8mg/ml                                     | 146 (46%)              | NA               | Variation ≥15% | 5               | 97              | 60      | 60      | NA              |
|                                 |                       |                   |                                       |             |                                                                        |                        |                  | Variation ≥10% | 14              | 96              | 62      | 69      | NA              |
|                                 |                       |                   |                                       |             |                                                                        |                        |                  | Variation ≥5%  | 56              | 69              | 66      | 56      |                 |
| Thiadens ERJ 1998               | 170                   | Primary care      | Persistent cough for at least 2 weeks | 0%          | PD20M < 15.6 μmol                                                      | 43 (25%)               | NA               | Variation ≥20% | 36              | 82              | 65      | 58      | NA              |
|                                 |                       |                   |                                       |             |                                                                        |                        |                  | Variation ≥15% | 56              | 73              | 70      | 58      | NA              |
| Parameswaran ERJ 1999           | 132                   | Secondary care    | Asthma symptoms                       | NA          | Chest physician judgment                                               | 56 (42%)               | NA               | Variation ≥20% | 77              | 74              | 79      | 72      | NA              |
| Goldstein Chest 2000            | 57                    | Secondary care    | Asthma symptoms                       | 0%          | PC20M, BdR, ICS response or fluctuation on several spirometry findings | 41(72%)                | NA               | Variation ≥20% | 54              | 75              | 39      | 85      | NA              |
| Hunter Chest 2002               | 89                    | Secondary care    | Asthma symptoms                       | 46%         | PC20M < 8 mg/ml or BdR 15% or ΔPEF20%                                  | 69 (77%)               | NA               | Variation ≥22% | 43 (31-55)      | 75 (56-94)      | 28      | 86      | NA              |
| Ulrik J Asthma 2005             | 609                   | Population survey | NA                                    | NA          | Self-reported asthma                                                   | 74 (12%)               | NA               | Variation ≥20% | 47              | 90              | 92      | 41      | NA              |
|                                 |                       |                   |                                       |             |                                                                        |                        |                  |                |                 |                 |         |         |                 |

| Index test                     | N                     | Setting                                       | Population                                                                 | ICS treated | Reference                             | Asthma diagnosis N (%) | AUC  | Cut-off            | Sensitivity (%) | Specificity (%) | NPV (%) | PPV (%) | 95% specificity |
|--------------------------------|-----------------------|-----------------------------------------------|----------------------------------------------------------------------------|-------------|---------------------------------------|------------------------|------|--------------------|-----------------|-----------------|---------|---------|-----------------|
| <b>SGaw</b>                    |                       |                                               |                                                                            |             |                                       |                        |      |                    |                 |                 |         |         |                 |
| Topalovic Respir Research 2016 | 349                   | Secondary care<br>FEV <sub>1</sub> /FVC > LLN | Asthma symptoms Vs Healthy Subjects*                                       | NA          | Chest physician diagnosis (BC or BdR) | 213 (61%)              | NA   | 0.98<br>1/Kpas.sec | 50              | 64              | NA      | 75      | NA              |
| Bougard Bioch Pharmacol 2020   | 121 training cohort   | Secondary care                                | Referred to an asthma clinic                                               | 45%         | PC20M < 16 mg/ml                      | 85(66%)                | 0.69 | 0.73 1/Kpas.sec    | 86              | 49              | 47      | 87      | NA              |
| Bougard Bioch Pharmacol 2020   | 149 validation cohort | Secondary care                                | Referred to an asthma clinic                                               | 47%         | PC20M < 16 mg/ml                      | 96 (68%)               | 0.62 | 0.87 1/Kpas.sec    | 51              | 71              | 45      | 76      | NA              |
| <b>RV/TLC</b>                  |                       |                                               |                                                                            |             |                                       |                        |      |                    |                 |                 |         |         |                 |
| Stanbrook Chest 1995           | 169                   | Secondary care                                | Referred to a laboratory function<br>FEV <sub>1</sub> /FVC > 90% predicted | NA          | PC20M < 8mg/ml                        | 72 (43%)               | NA   | 120% predicted     | 29              | 81              | 54      | 61      | NA              |
|                                |                       |                                               |                                                                            |             |                                       |                        | NA   | 125% predicted     | 28              | 88              | 62      | 62      | NA              |
|                                |                       |                                               |                                                                            |             |                                       |                        | NA   | 130% predicted     | 24              | 91              | 65      | 61      | NA              |
|                                |                       |                                               |                                                                            |             |                                       |                        | NA   | 135% predicted     | 17              | 96              | 75      | 61      | NA              |
|                                |                       |                                               |                                                                            |             |                                       |                        | NA   | 140% predicted     | 10              | 97              | 70      | 59      | NA              |
| Bougard Bioch Pharmacol 2020   | 121 training cohort   | Secondary care                                | Asthma symptoms                                                            | 44%         | PC20M < 16 mg/ml                      | 85(66%)                | 0.74 | 99% predicted      | 54              | 87              | 69      | 79      | NA              |
|                                | 149 validation cohort | Secondary care                                | Asthma symptoms                                                            | 47%         | PC20M < 16 mg/ml                      | 96 (68%)               | 0.75 | 102% predicted     | 71              | 68              | 51      | 83      | NA              |

PC20M: Provocative concentration of methacholine causing a fall in FEV<sub>1</sub> of 20%

BdR: Bronchodilator reversibility

ΔPEF 20%: Peak expiratory flow variability of at least 20%
