# Supplementary material
Source: HighWire-hosted journal article supplement (https://erj.ersjournals.com/content/60/3/2101585)
Supplement: inline-supplementary-material-14 [file inline-supplementary-material-14.pdf]

**Online supplementary Table S9: Blood eosinophils and total serum IgE performance to make a diagnosis of asthma**

|                                  | N   |                | Population      | ICS treated | Reference                 | AUC              | Cut-off  | Sensitivity | Specificity | NPV  | PPV | 95% specificity |
|----------------------------------|-----|----------------|-----------------|-------------|---------------------------|------------------|----------|-------------|-------------|------|-----|-----------------|
| <b>Blood Eosinophils</b>         |     |                |                 |             |                           |                  |          |             |             |      |     |                 |
| Hunter Chest 2002                | 89  | Secondary care | Asthma symptoms | 46%         | BC or BdR or $\Delta$ PEF | ?                | 6.3%     | 21          | 100         | 0,27 | 100 | ?               |
| Yurdakul J Asthma 2005           | 100 | Secondary care | Asthma symptoms | 48%         | BC or BdR or $\Delta$ PEF | ?                | ?        | 59          | 71          | 51   | 77  | ?               |
| Popovic-Glre Coll Antropol 2002  | 195 | Secondary care | Asthma symptoms | 0%?         | BdR                       | ?                | ?        | 15          | 39          | 74   | 64  | ?               |
| Tilemann Prim Care Respir J 2011 | 210 | Primary care   | Asthma symptoms | 5%          | BC or BdR                 | 0.60 (0.52-0.68) | 4.2%     | 36          | 83          | 65   | 59  | ?               |
| Nekoe ERJ open 2020              | 702 | Secondary care | Asthma symptoms | 0%          | BC or BdR                 | 0.58 (0.54-0.62) | 4.4%     | 23          | 91          | 54   | 72  | 5.9%            |
| <b>Total serum IgE</b>           |     |                |                 |             |                           |                  |          |             |             |      |     |                 |
| Yurdakul J Asthma 2005           | 100 | Secondary care | Asthma symptoms | 48%         | BC or BdR or $\Delta$ PEF | ?                | ?        | 33          | 85          | 46   | 76  | ?               |
| Popovic-Glre Coll Antropol 2002  | 195 | Secondary care | Asthma symptoms | 0%?         | BdR                       | ?                | ?        | 51          | 72          | 59   | 72  | ?               |
| Tilemann Prim Care Respir J 2011 | 210 | Primary care   | Asthma symptoms | 5%          | BC or BdR                 | 0.58             | 90 Ku/L  | 47          | 73          | 66   | 54  | ?               |
| Nekoe ERJ open 2020              | 702 | Secondary care | Asthma symptoms | 0%          | BC or BdR                 | 0.57             | 132 Ku/L | 41          | 78          | 57   | 64  | 584 Ku/L        |

BC: bronchial challenge

BdR: bronchodilator reversibility test

$\Delta$ PEF: peak expiratory flow variability
