# Supplementary material
Source: HighWire-hosted journal article supplement (https://erj.ersjournals.com/content/60/3/2101585)
Supplement: inline-supplementary-material-16 [file inline-supplementary-material-16.pdf]

## Online supplementary Table S10b

### QUESTION

#### Can measuring total serum IgE help diagnose asthma in adults with episodic/chronic suggestive symptoms?

|                 |                                                                                                                                                                                                                                                                                                                                                                                                                                                                       |
|-----------------|-----------------------------------------------------------------------------------------------------------------------------------------------------------------------------------------------------------------------------------------------------------------------------------------------------------------------------------------------------------------------------------------------------------------------------------------------------------------------|
| POPULATION:     | Population of adults (>18 yrs old) with diagnostic uncertainty of asthma                                                                                                                                                                                                                                                                                                                                                                                              |
| INTERVENTION:   | Total serum IgE test                                                                                                                                                                                                                                                                                                                                                                                                                                                  |
| GOLD STANDARD : | 1. Peak flow variability > 20% or spontaneous variation in FEV <sub>1</sub> > 12%- and 200-ml between several clinic visits<br>2. Bronchodilation > 12% AND > 200 ml improvement<br>3. Airway hyperresponsiveness: PC20 < 16 mg/ml (or 8 mg/ml) of Methacholine (or Histamine) or PD mannitol < 625 mg or fall in FEV <sub>1</sub> > 10% after exercise<br>4. Improvement in FEV <sub>1</sub> > 12% and 200 ml after a 2-week course of OCS or a 4-week course of ICS |

### ASSESSMENT

#### Test accuracy

How accurate is the test?

| JUDGEMENT                                                                                                                                                                                                                         | RESEARCH EVIDENCE                                                                                                                                                               | ADDITIONAL CONSIDERATIONS                                                                                                                                                                                           |
|-----------------------------------------------------------------------------------------------------------------------------------------------------------------------------------------------------------------------------------|---------------------------------------------------------------------------------------------------------------------------------------------------------------------------------|---------------------------------------------------------------------------------------------------------------------------------------------------------------------------------------------------------------------|
| <input type="radio"/> Very inaccurate<br><input checked="" type="radio"/> Inaccurate<br><input type="radio"/> Accurate<br><input type="radio"/> Very accurate<br><input type="radio"/> Varies<br><input type="radio"/> Don't know | Low test sensitivity (ranging from 0.33 to 0.51)<br><br>Greater specificity (ranging from 0.72 to 0.85)<br><br>One study (Nekoe et al) provided the 95% specificity at 584 Ku/L | Two large studies (one prospective from primary care and one retrospective from secondary care) providing similar AUC.<br><br>AUC around 0,6. Thresholds ranging from 90 to 132 Ku/L (Tilemann et al ; Nekoe et al) |

#### Desirable Effects

How substantial are the desirable anticipated effects?

| JUDGEMENT                                                                                                 | RESEARCH EVIDENCE                                                                                                                    | ADDITIONAL CONSIDERATIONS |
|-----------------------------------------------------------------------------------------------------------|--------------------------------------------------------------------------------------------------------------------------------------|---------------------------|
| <input type="radio"/> Trivial<br><input type="radio"/> Small<br><input checked="" type="radio"/> Moderate | Total serum IgE might be useful to endotype asthma and establish eligibility to biological treatment in severe forms of the disease. |                           |

|                                                                                                   |                                                                                 |  |
|---------------------------------------------------------------------------------------------------|---------------------------------------------------------------------------------|--|
| <ul style="list-style-type: none"> <li>○ Large</li> <li>○ Varies</li> <li>○ Don't know</li> </ul> | An elevated level should prompt detailed investigation towards specific allergy |  |
|---------------------------------------------------------------------------------------------------|---------------------------------------------------------------------------------|--|

## Undesirable Effects

How substantial are the undesirable anticipated effects?

| JUDGEMENT                                                                                                                                                 | RESEARCH EVIDENCE                                                                                                                             | ADDITIONAL CONSIDERATIONS |
|-----------------------------------------------------------------------------------------------------------------------------------------------------------|-----------------------------------------------------------------------------------------------------------------------------------------------|---------------------------|
| <ul style="list-style-type: none"> <li>○ Large</li> <li>○ Moderate</li> <li>○ Small</li> <li>X Trivial</li> <li>○ Varies</li> <li>○ Don't know</li> </ul> | No major undesirable effects. Pain and concerns related to venepuncture.<br>Potential impact of other allergic comorbidities on test results. |                           |

## Certainty of the evidence of test accuracy

What is the overall certainty of the evidence of test accuracy?

| JUDGEMENT                                                                                                                                      | RESEARCH EVIDENCE                 | ADDITIONAL CONSIDERATIONS |
|------------------------------------------------------------------------------------------------------------------------------------------------|-----------------------------------|---------------------------|
| <ul style="list-style-type: none"> <li>○ Very low</li> <li>X Low</li> <li>○ Moderate</li> <li>○ High</li> <li>○ No included studies</li> </ul> | Few observational studies. No RCT |                           |

## Certainty of the evidence of management's effects

What is the overall certainty of the evidence of effects of the management that is guided by the test results?

| JUDGEMENT                                                                                                                                      | RESEARCH EVIDENCE                                                                                                                                                                                        | ADDITIONAL CONSIDERATIONS |
|------------------------------------------------------------------------------------------------------------------------------------------------|----------------------------------------------------------------------------------------------------------------------------------------------------------------------------------------------------------|---------------------------|
| <ul style="list-style-type: none"> <li>○ Very low</li> <li>X Low</li> <li>○ Moderate</li> <li>○ High</li> <li>○ No included studies</li> </ul> | High total serum IgE suggests but not proves atopy, a condition often associated with asthma. The presence of atopy may drive some aspect of the treatment (allergen avoidance, immunotherapy, anti-IgE) |                           |

## Certainty of the evidence of test result/management

How certain is the link between test results and management decisions?

| JUDGEMENT                                                                                                                                                                                                                                               | RESEARCH EVIDENCE | ADDITIONAL CONSIDERATIONS |
|---------------------------------------------------------------------------------------------------------------------------------------------------------------------------------------------------------------------------------------------------------|-------------------|---------------------------|
| <ul style="list-style-type: none"><li><input type="radio"/> Very low</li><li><input checked="" type="radio"/> Low</li><li><input type="radio"/> Moderate</li><li><input type="radio"/> High</li><li><input type="radio"/> No included studies</li></ul> |                   |                           |

## Balance of effects

Does the balance between desirable and undesirable effects favor the intervention or the comparison?

| JUDGEMENT                                                                                                                                                                                                                                                                                                                                                                                                                                                     | RESEARCH EVIDENCE                                                                                                                                                                                                                                                                             | ADDITIONAL CONSIDERATIONS |
|---------------------------------------------------------------------------------------------------------------------------------------------------------------------------------------------------------------------------------------------------------------------------------------------------------------------------------------------------------------------------------------------------------------------------------------------------------------|-----------------------------------------------------------------------------------------------------------------------------------------------------------------------------------------------------------------------------------------------------------------------------------------------|---------------------------|
| <ul style="list-style-type: none"><li><input checked="" type="radio"/> Favors the comparison</li><li><input type="radio"/> Probably favors the comparison</li><li><input type="radio"/> Does not favor either the intervention or the comparison</li><li><input type="radio"/> Probably favors the intervention</li><li><input type="radio"/> Favors the intervention</li><li><input type="radio"/> Varies</li><li><input type="radio"/> Don't know</li></ul> | <p>Serum IgE has an insufficient sensitivity to diagnose asthma</p> <p>As a marker of airway inflammation FeNO offers a better alternative allowing for immediate results and, overall, slightly greater statistical performance</p> <p>Bronchial challenge tests show better PPV and NPV</p> |                           |

## Resources required

How large are the resource requirements (costs)?

| JUDGEMENT                                                                                                                                                                                                                                                                                                                                                                     | RESEARCH EVIDENCE                                         | ADDITIONAL CONSIDERATIONS |
|-------------------------------------------------------------------------------------------------------------------------------------------------------------------------------------------------------------------------------------------------------------------------------------------------------------------------------------------------------------------------------|-----------------------------------------------------------|---------------------------|
| <ul style="list-style-type: none"><li><input type="radio"/> Large costs</li><li><input type="radio"/> Moderate costs</li><li><input checked="" type="radio"/> Negligible costs and savings</li><li><input type="radio"/> Moderate savings</li><li><input type="radio"/> Large savings</li><li><input type="radio"/> Varies</li><li><input type="radio"/> Don't know</li></ul> | <p>Non-expensive and easy to perform and to read test</p> |                           |

## Equity

What would be the impact on health equity?

| JUDGEMENT                                                                                                                                                                                                                                                                         | RESEARCH EVIDENCE                                  | ADDITIONAL CONSIDERATIONS |
|-----------------------------------------------------------------------------------------------------------------------------------------------------------------------------------------------------------------------------------------------------------------------------------|----------------------------------------------------|---------------------------|
| <input type="radio"/> Reduced<br><input type="radio"/> Probably reduced<br><input checked="" type="radio"/> Probably no impact<br><input type="radio"/> Probably increased<br><input type="radio"/> Increased<br><input type="radio"/> Varies<br><input type="radio"/> Don't know |                                                    |                           |
| <b>Acceptability</b><br>Is the intervention acceptable to key stakeholders?                                                                                                                                                                                                       |                                                    |                           |
| JUDGEMENT                                                                                                                                                                                                                                                                         | RESEARCH EVIDENCE                                  | ADDITIONAL CONSIDERATIONS |
| <input type="radio"/> No<br><input type="radio"/> Probably no<br><input checked="" type="radio"/> Probably yes<br><input type="radio"/> Yes<br><input type="radio"/> Varies<br><input type="radio"/> Don't know                                                                   |                                                    |                           |
| <b>Feasibility</b><br>Is the intervention feasible to implement?                                                                                                                                                                                                                  |                                                    |                           |
| JUDGEMENT                                                                                                                                                                                                                                                                         | RESEARCH EVIDENCE                                  | ADDITIONAL CONSIDERATIONS |
| <input type="radio"/> No<br><input type="radio"/> Probably no<br><input type="radio"/> Probably yes<br><input checked="" type="radio"/> Yes<br><input type="radio"/> Varies<br><input type="radio"/> Don't know                                                                   | Non-expensive and easy to perform and to read test |                           |

## TYPE OF RECOMMENDATION

|                                                                         |                                                          |                                                                                                   |                                                                          |                                                                     |
|-------------------------------------------------------------------------|----------------------------------------------------------|---------------------------------------------------------------------------------------------------|--------------------------------------------------------------------------|---------------------------------------------------------------------|
| Strong recommendation against the intervention<br><input type="radio"/> | Conditional recommendation against the intervention<br>● | Conditional recommendation for either the intervention or the comparison<br><input type="radio"/> | Conditional recommendation for the intervention<br><input type="radio"/> | Strong recommendation for the intervention<br><input type="radio"/> |
|-------------------------------------------------------------------------|----------------------------------------------------------|---------------------------------------------------------------------------------------------------|--------------------------------------------------------------------------|---------------------------------------------------------------------|

## CONCLUSIONS

### Recommendation

The TF suggests not measuring total serum IgE for asthma diagnosis (Conditional recommendation, low quality of evidence)

Total serum IgE does not define asthma but rather contributes to phenotyping

### Justification

Total serum IgE should not be used for the diagnosis of asthma because of consistently poor sensitivities across the studies, reaching at best 51%. This is in line with the existence of a significant proportion of non IgE-mediated asthma, also called “intrinsic” asthma. Measuring total serum IgE does not provide immediate results at the time of the consultation. If specificity is better than sensitivity it remains limited at the cut-offs provided by the ROC curves, ranging from 39% to 85%. The value of measuring IgE may vary according to the population of patients investigated, the seasonal manifestations of the symptoms, the coexistence of allergic rhinitis and is likely to be more valid in young patients as IgE levels decline with age.
