# Supplementary material
Source: HighWire-hosted journal article supplement (https://erj.ersjournals.com/content/60/3/2101585)
Supplement: inline-supplementary-material-17 [file inline-supplementary-material-17.pdf]

**Table S11a: Can combining FeNO, blood eosinophils and IgE help diagnose asthma in adults with episodic/chronic suggestive symptoms?**

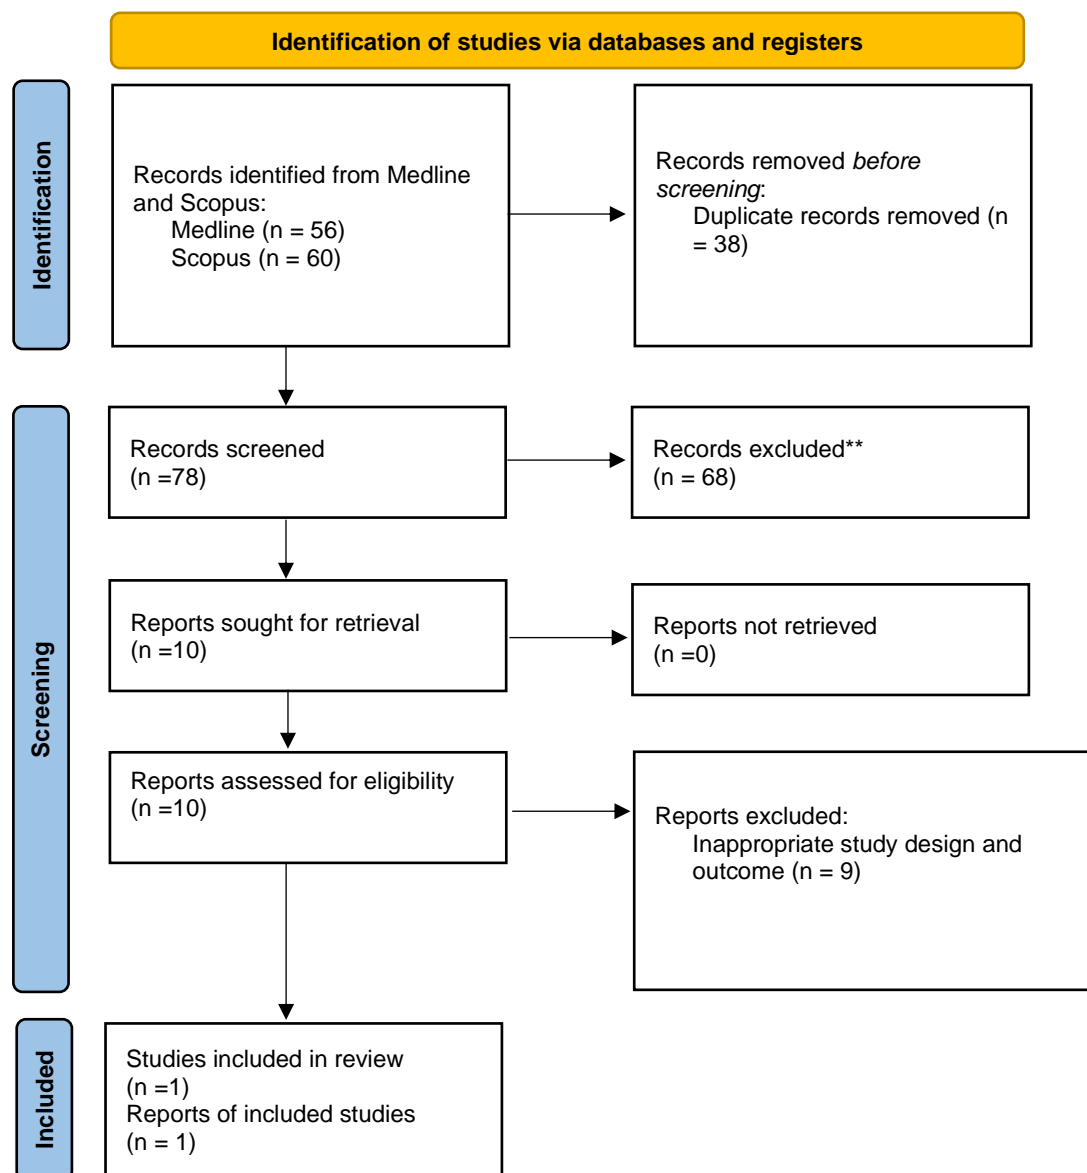

\*Consider, if feasible to do so, reporting the number of records identified from each database or register searched (rather than the total number across all databases/registers).

\*\*If automation tools were used, indicate how many records were excluded by a human and how many were excluded by automation tools.
