# Supplementary material
Source: HighWire-hosted journal article supplement (https://erj.ersjournals.com/content/60/3/2101585)
Supplement: inline-supplementary-material-21 [file inline-supplementary-material-21.pdf]

**Table S13: Diagnostic performance of bronchodilator reversibility testing and bronchial challenge to make a diagnosis of asthma**

|                                             | N   |                                              | Population           | ICS treated | Asthma Diagnosis (%) | Cut-off                    | Sensitivity (%) | Specificity (%) | NPV (%) | PPV (%) |
|---------------------------------------------|-----|----------------------------------------------|----------------------|-------------|----------------------|----------------------------|-----------------|-----------------|---------|---------|
| <b>Bronchodilator reversibility testing</b> |     |                                              |                      |             |                      |                            |                 |                 |         |         |
| Goldstein Chest 2000                        | 57  | Referral from primary care to secondary care | Asthma symptoms      | 0%          | 48 (84%)             | 12% and 200 ml improvement | 6               | 100             | 16      | 100     |
| Hunter Chest 2002                           | 89  | Secondary care                               | Asthma symptoms      | 46%         | 69 (77%)             | 2,9%                       | 41              | 70              | 29      | 85      |
| Yurdakul J Asthma 2005                      | 100 | Secondary care                               | Asthma symptoms      | 48%         |                      | 15%                        | 32              | 71              | 48      | 90      |
| Ulrik J Asthma 2005                         | 609 | Population survey                            | Self-reported asthma | ?           | 74 (12%)             | 10%                        | 9               | 93              | 88      | 16      |
| Popordis J Asthma 2016                      | 88  | Secondary care                               | Asthma symptoms      | 0%          | 70 (79%)             | 12% and 200 ml improvement | 100             | 100             | 100     | 100     |
| Louis JACI pract 2020                       | 194 | Secondary care                               | Asthma symptoms      | 0%          | 148 (76%)            | 12% and 200 ml improvement | 26              | 100             | 30%     | 100     |
| <b>Bronchial challenge</b>                  |     |                                              |                      |             |                      |                            |                 |                 |         |         |
| Goldstein Chest 2000                        | 57  | Referral from primary care to secondary care | Asthma symptoms      | 0%          | 48 (84%)             | PC20M < 8mg/ml             | 86              | 100             | 56      | 100     |
| Hunter Chest 2002                           | 89  |                                              | Asthma symptoms      | 46%         | 69 (77%)             | PC20M < 8 mg/ml            | 91              | 90              | 75      | 97      |
| Yurdakul J Asthma 2005                      | 100 | Secondary care                               | Asthma symptoms      | 48%         |                      | PC20M < 8 mg/ml            | 97              | 78              | 93      | 87      |
| Ulrik J Asthma 2005                         | 609 | Population survey                            | Self-reported asthma | ?           | 74 (12%)             | PC20H < 16 mg/ml           | 93              | 94              | 99      | 69      |
| Popordis J Asthma 2016                      | 88  | Secondary care                               | Asthma symptoms      | 0%          | 67 (76%)             | PC20M < 16 mg/ml           | 63              | 86              | 36      | 94      |
|                                             | 88  | Secondary care                               | Asthma symptoms      | 0%          | 67 (76%)             | PD15 Mannitol <635mg       | 64              | 95              | 45      | 98      |
| Louis JACI pract 2020                       | 194 | Secondary care                               | Asthma symptoms      | 0%          | 148 (76%)            | PC20 M < 8mg/ml            | 95              | 100             | 87      | 100     |

In two studies (Goldstein, Louis) asthma was diagnosed either by a significant bronchodilation or by positive bronchial challenge testing so that specificity was 100% for both tests. In the Popordis study, asthma was diagnosed by symptoms + significant bronchodilator reversibility (12% and 200 ml improvement) so that bronchodilator reversibility has 100% sensitivity and specificity
