# Supplementary material
Source: HighWire-hosted journal article supplement (https://erj.ersjournals.com/content/60/3/2101585)
Supplement: inline-supplementary-material-25 [file inline-supplementary-material-25.pdf]

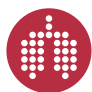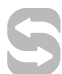

SHAREABLE PDF

# European Respiratory Society guidelines for the diagnosis of asthma in adults

Renaud Louis<sup>1,22</sup>, Imran Satia<sup>2,23</sup>, Inigo Ojanguren<sup>3,23</sup>, Florence Schleich<sup>4,23</sup>, Matteo Bonini<sup>5,23</sup>, Thomy Tonia<sup>6</sup>, David Rigau<sup>7</sup>, Anne ten Brinke<sup>8</sup>, Roland Buhl<sup>9</sup>, Stelios Loukides<sup>10</sup>, Janwillem W. H. Kocks<sup>11</sup>, Louis-Philippe Boulet<sup>12</sup>, Arnaud Bourdin<sup>13</sup>, Courtney Coleman<sup>14</sup>, Karen Needham<sup>14</sup>, Mike Thomas<sup>15</sup>, Marco Idzko<sup>16</sup>, Alberto Papi<sup>17</sup>, Celeste Porsbjerg<sup>18</sup>, Daniel Schuermans<sup>19</sup>, Joan B. Soriano<sup>20</sup> and Omar S. Usmani<sup>21,24</sup>

<sup>1</sup>Dept of Pneumology, CHU Liege, GIGA I<sup>3</sup> Research Group, University of Liege, Liege, Belgium. <sup>2</sup>Division of Respiriology, McMaster University, Hamilton, ON, Canada. <sup>3</sup>Servei de Pneumologia, Hospital Universitari Vall d'Hebron, Universitat Autònoma de Barcelona (UAB); Vall d'Hebron Institut de Recerca (VHIR); CIBER de Enfermedades Respiratorias (CIBERES), Barcelona, Spain. <sup>4</sup>Dept of Pulmonary Medicine, University of Liege, Liège, Belgium. <sup>5</sup>Sapienza University of Rome, Rome, Italy. <sup>6</sup>Institute of Social and Preventive Medicine, University of Bern, Bern, Switzerland. <sup>7</sup>Iberoamerican Cochrane Centre, Barcelona, Spain. <sup>8</sup>Pulmonology, Medical Center Leeuwarden, Leeuwarden, The Netherlands. <sup>9</sup>Pulmonary Dept, Mainz University Hospital, Mainz, Germany. <sup>10</sup>University of Athens, Athens, Greece. <sup>11</sup>General Practitioners Research Institute, Groningen, The Netherlands. <sup>12</sup>Pneumologie, Institut universitaire de cardiologie et de pneumologie de Québec – Université Laval, Quebec, QC, Canada. <sup>13</sup>University of Montpellier, Montpellier, France. <sup>14</sup>European Lung Foundation, Sheffield, UK. <sup>15</sup>Primary Care and Population Sciences Division, University of Southampton, Southampton, UK. <sup>16</sup>Dept of Respiratory Medicine, Medical University of Vienna, Vienna, Austria. <sup>17</sup>Respiratory Medicine, University of Ferrara, Ferrara, Italy. <sup>18</sup>Respiratory Medicine, Copenhagen University Hospital Bispebjerg, Copenhagen, Denmark. <sup>19</sup>Respiratory Division, Academic Hospital UZBrussel, Brussels, Belgium. <sup>20</sup>Universidad Autónoma de Madrid, Hospital Universitario de la Princesa, Madrid, Spain. <sup>21</sup>National Heart and Lung Institute, Imperial College London, London, UK. <sup>22</sup>Taskforce chair. <sup>23</sup>These authors contributed equally. <sup>24</sup>Taskforce co-chair.

Corresponding author: Omar S. Usmani ([o.usmani@imperial.ac.uk](mailto:o.usmani@imperial.ac.uk))

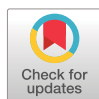

Shareable abstract (@ERSpublications)

**Asthma diagnosis in adults still remains a challenge with over- and under-diagnosis. Spirometry with reversibility testing is essential. Nitric oxide, peak expiratory flow variability and bronchial challenge testing should also be considered.** <https://bit.ly/3ghCigm>

**Cite this article as:** Louis R, Satia I, Ojanguren I, *et al.* European Respiratory Society guidelines for the diagnosis of asthma in adults. *Eur Respir J* 2022; 60: 2101585 [DOI: 10.1183/13993003.01585-2021].

This single-page version can be shared freely online.

Copyright ©The authors 2022.  
For reproduction rights and  
permissions contact  
[permissions@ersnet.org](mailto:permissions@ersnet.org)

This article has an editorial  
commentary:  
<https://doi.org/10.1183/13993003.00716-2022>

Received: 4 June 2021  
Accepted: 10 Jan 2022

## Abstract

Although asthma is very common, affecting 5–10% of the population, the diagnosis of asthma in adults remains a challenge in the real world, which results in both over- and under-diagnosis. A taskforce was set up by the European Respiratory Society to systematically review the literature on the diagnostic accuracy of tests used to diagnose asthma in adult patients and provide recommendations for clinical practice. The taskforce defined eight Population, Index, Comparator and Outcome questions that were assessed using the Grading of Recommendations, Assessment, Development and Evaluation approach. The taskforce utilised the outcomes to develop an evidence-based diagnostic algorithm, with recommendations for a pragmatic guideline for everyday practice that was directed by real-life patient experiences.

The taskforce supports the initial use of spirometry followed by bronchodilator reversibility testing (if airway obstruction is present). If initial spirometry fails to show obstruction, further tests should be performed in the following order: exhaled nitric oxide fraction, peak expiratory flow variability, or, in secondary care, bronchial challenge. We present the thresholds for each test that are compatible with a diagnosis of asthma in the presence of current symptoms.

The taskforce reinforces spirometry as a priority and recognises the value of measuring blood eosinophils and serum immunoglobulin E to phenotype the patient. Measuring gas trapping by body plethysmography in patients with preserved forced expiratory volume in 1 s/forced vital capacity ratio deserves further attention. The taskforce draws attention to the difficulty of making a correct diagnosis in patients already

receiving inhaled corticosteroids; the comorbidities that may obscure diagnosis; the importance of phenotyping; and the necessity of considering the patient experience in the diagnostic process.
